# Supplementary material for: Association between Vitamin Intake during Pregnancy and Risk of Small for Gestational Age
Source: MDPI journal article supplement (doi:10.3390/nu9121277), 2017-11-23
Supplement: s1 [file s1]

# Supplementary: Association between Vitamin Intake during Pregnancy and Risk of Small for Gestational Age

Inmaculada Salcedo-Bellido <sup>1,2,3</sup>, Juan Miguel Martínez-Galiano <sup>2,4,5,6\*</sup>, Rocío Olmedo-Requena <sup>1,2,3</sup>, Juan Mozas-Moreno <sup>2,7</sup>, Aurora Bueno-Cavanillas <sup>1,2,3</sup>, Jose J. Jimenez-Moleon <sup>1,2,3</sup> and Miguel Delgado-Rodríguez <sup>2,8</sup>

**Table S1.** Multivitamin/mineral supplements during pregnancy among healthy Spanish women ( $n = 1036$ ).

|     | Cases<br>( $n = 518$ ) |      | Controls<br>( $n = 518$ ) |      | SGA <sup>a</sup> |           |                  |           |
|-----|------------------------|------|---------------------------|------|------------------|-----------|------------------|-----------|
|     | $n$                    | (%)  | $n$                       | (%)  | cOR <sup>b</sup> | 95% CI    | aOR <sup>c</sup> | 95% CI    |
| No  | 400                    | 77.2 | 396                       | 76.4 | 1 (reference)    |           | 1 (reference)    |           |
| Yes | 118                    | 22.8 | 122                       | 23.6 | 0.95             | 0.71-1.29 | 0.93             | 0.66-1.29 |

<sup>a</sup>SGA: Small for Gestational Age; <sup>b</sup>cOR: Crude odds ratio and confidence intervals (95% CI); <sup>c</sup>aOR: Adjusted odds ratio by energy intake, preeclampsia, education level, pre-pregnancy body mass index, smoking, weight gain per week during pregnancy, and previous preterm/LBW newborn and anemia during pregnancy.
